# Supplementary material for: Laughter is the Best Medicine? A Cross-Sectional Study of Cardiovascular Disease Among Older Japanese Adults
Source: PubMed Central journal article supplement (PMC5037252; doi:10.2188/jea.je20150196), 2016-10-05
Supplement: je-26-546-s001.pdf [file je-26-546-s001.pdf]

**eTable 1.** Characteristics of the subjects by gender

|                                                   | Men<br>(n=10,206) | Women<br>(n=10,728) |
|---------------------------------------------------|-------------------|---------------------|
| <b>Cardiovascular diseases (%)</b>                |                   |                     |
| Heart diseases                                    | 1,382 (13.5%)     | 856 (8.0%)          |
| Stroke                                            | 460 (4.5%)        | 216 (2.0%)          |
| <b>Risk factor diseases (%)</b>                   |                   |                     |
| Hyperlipidemia                                    | 974 (9.5%)        | 1,560 (14.5%)       |
| Hypertension                                      | 4,361 (42.7%)     | 4,637 (43.2%)       |
| <b>Frequency of laughing in 4 weeks (%)</b>       |                   |                     |
| Never or almost never                             | 1,022 (10.0%)     | 570 (5.3%)          |
| 1-3 days per month                                | 1,509 (14.8%)     | 963 (9.0%)          |
| 1-5 days per week                                 | 3,846 (37.7%)     | 3,991 (37.2%)       |
| Almost everyday                                   | 3,829 (37.5%)     | 5,204 (48.5%)       |
| <b>Depression (%)</b>                             |                   |                     |
| GDS score $\geq 5$                                | 1,555 (15.2%)     | 1,677 (15.6%)       |
| GDS score $< 5$                                   | 8,651 (84.8%)     | 9,051 (84.4%)       |
| <b>Age, years (%; mean [SD])</b>                  |                   |                     |
| 65-69                                             | 3,162 (31.0%)     | 3,143 (29.3%)       |
| 70-74                                             | 3,084 (30.2%)     | 3,324 (31.0%)       |
| 75-79                                             | 2,207 (21.6%)     | 2,291 (21.4%)       |
| $\geq 80$                                         | 1,753 (17.2%)     | 1,970 (18.4%)       |
| Mean (SD)                                         | 73.42 (6.01)      | 73.69 (6.15)        |
| <b>Body mass index (%; mean [SD])<sup>a</sup></b> |                   |                     |
| Continuous: Mean (SD)                             | 23.11 (2.90)      | 22.64 (3.31)        |
| 1st quintile                                      | 1,998 (19.6%)     | 2,045 (19.1%)       |
| 2nd quintile                                      | 1,944 (19.0%)     | 2,047 (19.1%)       |
| 3rd quintile                                      | 1,972 (19.3%)     | 2,051 (19.1%)       |
| 4th quintile                                      | 2,031 (19.9%)     | 2,018 (18.8%)       |
| 5th quintile                                      | 1,903 (18.6%)     | 2,040 (19.0%)       |
| Missing data                                      | 358 (3.5%)        | 527 (4.9%)          |
| <b>Alcohol consumption (%)</b>                    |                   |                     |
| Never or almost never                             | 3,437 (33.7%)     | 8,681 (80.9%)       |
| Stopped drinking                                  | 848 (8.3%)        | 197 (1.8%)          |
| Drinking                                          | 5,820 (57.0%)     | 1,718 (16.0%)       |
| Missing data                                      | 101 (1.0%)        | 132 (1.2%)          |
| <b>Smoking habit (%)</b>                          |                   |                     |
| Never or almost never                             | 5,067 (49.6%)     | 9,958 (92.8%)       |

|                                                                                      |               |               |
|--------------------------------------------------------------------------------------|---------------|---------------|
| Stopped smoking                                                                      | 3,159 (31.0%) | 251 (2.3%)    |
| Currently smoking                                                                    | 1,871 (18.3%) | 373 (3.5%)    |
| Missing data                                                                         | 109 (1.1%)    | 146 (1.4%)    |
| <b>Physical activity (%)</b>                                                         |               |               |
| Less than once per week                                                              | 2,054 (20.1%) | 1,119 (10.4%) |
| Once or more per week                                                                | 7,038 (69.0%) | 7,835 (73.0%) |
| Missing data                                                                         | 1,114 (10.9%) | 1,774 (16.5%) |
| <b>Frequency of social participation per year (%; median [25%, 75%])<sup>b</sup></b> |               |               |
| Median [25%, 75%]                                                                    | 24 [0, 102]   | 24 [0, 132]   |
| 1st quartile                                                                         | 2,327 (22.8%) | 2,296 (21.4%) |
| 2nd quartile                                                                         | 2,087 (20.4%) | 1,612 (15.0%) |
| 3rd quartile                                                                         | 1,767 (17.3%) | 1,907 (17.8%) |
| 4th quartile                                                                         | 2,040 (20.0%) | 1,932 (18.0%) |
| Missing data                                                                         | 1,985 (19.4%) | 2,981 (27.8%) |

CI, confidence interval; GDS, Geriatric Depression Scale; SD, standard deviation.

<sup>a</sup>1st quintile (Men: 13.52 - 20.76, Women: 6.67 - 19.92); 2nd quintile (Men: 20.76 - 22.32,

Women: 19.92- 21.49); 3rd quintile (Men: 22.32 - 23.63., Women: 21.49 - 23.12); 4th quintile (Men:

23.63 - 25.39, Women: 23.12 - 25.20); 5th quintile (Men: 25.39 - 36.21, Women: 25.20 - 41.42)

<sup>b</sup>1st quartile (Men: 0 times, Women: 0 times); 2nd quartile (Men: 1-24 times, Women: 1-24 times); 3rd quartile (Men: 25-102 times, Women: 25-132 times); 4th quartile (Men: 103-2640 times, Women: 133-2004 times or more)
