# Supplementary material for: Laughter is the Best Medicine? A Cross-Sectional Study of Cardiovascular Disease Among Older Japanese Adults
Source: PubMed Central journal article supplement (PMC5037252; doi:10.2188/jea.je20150196), 2016-10-05
Supplement: je-26-546-s002.pdf [file je-26-546-s002.pdf]

**eTable 2.** Frequency of laughing in 4 weeks by participants' characteristics in men

|                                    | n     | Never or almost never<br>(% yes) | 1-3 days<br>per month<br>(% yes) | 1-5 days<br>per week<br>(% yes) | Almost<br>everyday<br>(% yes) |
|------------------------------------|-------|----------------------------------|----------------------------------|---------------------------------|-------------------------------|
| <b>Cardiovascular diseases (%)</b> |       |                                  |                                  |                                 |                               |
| Heart diseases                     | 1,382 | 168 (16.4%)                      | 226 (15.0%)                      | 508 (13.2%)                     | 480 (12.5%)                   |
| Stroke                             | 460   | 78 (7.6%)                        | 83 (5.5%)                        | 154 (4.0%)                      | 145 (3.8%)                    |
| <b>Risk factor diseases (%)</b>    |       |                                  |                                  |                                 |                               |
| Hyperlipidemia                     | 974   | 87 (8.5%)                        | 159 (10.5%)                      | 369 (9.6%)                      | 359 (9.4%)                    |
| Hypertension                       | 4,361 | 438 (42.9%)                      | 649 (43.0%)                      | 1,640<br>(42.6%)                | 1,634<br>(42.7%)              |
| <b>Depression (%)</b>              |       |                                  |                                  |                                 |                               |
| GDS score $\geq 5$                 | 1,555 | 429 (42.0%)                      | 334 (22.1%)                      | 505 (13.1%)                     | 287 (7.5%)                    |
| GDS score $< 5$                    | 8,651 | 593 (58.0%)                      | 1,175<br>(77.9%)                 | 3,341<br>(86.9%)                | 3,542<br>(92.5%)              |
| <b>Age, years (%)</b>              |       |                                  |                                  |                                 |                               |
| 6-69                               | 3,162 | 272 (26.6%)                      | 459 (30.4%)                      | 1,220<br>(31.7%)                | 1,211<br>(31.6%)              |
| 70-74                              | 3,084 | 269 (26.3%)                      | 405 (26.8%)                      | 1,154<br>(30.0%)                | 1,256<br>(32.8%)              |
| 75-79                              | 2,207 | 240 (23.5%)                      | 344 (22.8%)                      | 804 (20.9%)                     | 819 (21.4%)                   |
| $\geq 80$                          | 1,753 | 241 (23.6%)                      | 301 (19.9%)                      | 668 (17.4%)                     | 543 (14.2%)                   |
| <b>Body mass index</b>             |       |                                  |                                  |                                 |                               |
| 1st quintile                       | 1,998 | 254                              | 327                              | 770                             | 647                           |
| 2nd quintile                       | 1,944 | 197                              | 311                              | 745                             | 691                           |
| 3rd quintile                       | 1,972 | 172                              | 265                              | 781                             | 754                           |
| 4th quintile                       | 2,031 | 169                              | 284                              | 729                             | 849                           |
| 5th quintile                       | 1,903 | 176                              | 263                              | 700                             | 764                           |
| Missing data                       | 358   | 54                               | 59                               | 121                             | 124                           |
| <b>Alcohol consumption (%)</b>     |       |                                  |                                  |                                 |                               |
| Never or almost never              | 3,437 | 375 (36.7%)                      | 498 (33.0%)                      | 1,272<br>(33.1%)                | 1,292<br>(33.7%)              |
| Stopped drinking                   | 848   | 121 (11.8%)                      | 153 (10.1%)                      | 305 (7.9%)                      | 269 (7.0%)                    |
| Drinking                           | 5,820 | 518 (50.7%)                      | 831 (55.1%)                      | 2,230<br>(58.0%)                | 2,241<br>(58.5%)              |
| Missing data                       | 101   | 8 (0.8%)                         | 27 (1.8%)                        | 39 (1.0%)                       | 27 (0.7%)                     |
| <b>Smoking habit (%)</b>           |       |                                  |                                  |                                 |                               |
| Never or almost never              | 5,067 | 473 (46.3%)                      | 687 (45.5%)                      | 1,907                           | 2,000                         |

|                                                   |       |             |                 |                  |                  |
|---------------------------------------------------|-------|-------------|-----------------|------------------|------------------|
|                                                   |       |             |                 | (49.6%)          | (52.2%)          |
| Stopped smoking                                   | 3,159 | 318 (31.1%) | 493 (32.7%)     | 1,204<br>(31.3%) | 1,144<br>(29.9%) |
| Currently smoking                                 | 1,871 | 222 (21.7%) | 305 (20.2%)     | 698 (18.1%)      | 646 (16.9%)      |
| Missing data                                      | 109   | 9 (0.9%)    | 24 (1.6%)       | 37 (1.0%)        | 39 (1.0%)        |
| <b>Physical activity (%)</b>                      |       |             |                 |                  |                  |
| Less than once per week                           | 2,054 | 339 (33.2%) | 378 (25.0%)     | 681 (17.7%)      | 656 (17.1%)      |
| Once or more per week                             | 8,152 | 683 (66.8%) | 1131<br>(75.0%) | 3165<br>(82.3%)  | 3173<br>(82.9%)  |
| Missing data                                      | 1,114 | 119 (11.6%) | 141 (9.3%)      | 419 (10.9%)      | 435 (11.4%)      |
| <b>Frequency of social participation per year</b> |       |             |                 |                  |                  |
| 1st quartile                                      | 2,327 | 417         | 355             | 817              | 738              |
| 2nd quartile                                      | 2,087 | 216         | 343             | 771              | 757              |
| 3rd quartile                                      | 1,767 | 130         | 283             | 680              | 674              |
| 4th quartile                                      | 2,040 | 96          | 223             | 829              | 892              |
| Missing data                                      | 1,985 | 163         | 305             | 749              | 768              |

---

GDS, Geriatric Depression Scale.
