# Supplementary material for: Laughter is the Best Medicine? A Cross-Sectional Study of Cardiovascular Disease Among Older Japanese Adults
Source: PubMed Central journal article supplement (PMC5037252; doi:10.2188/jea.je20150196), 2016-10-05
Supplement: je-26-546-s003.pdf [file je-26-546-s003.pdf]

**eTable 3.** Frequency of laughing in 4 weeks by participants' characteristics in women

|                                    | N     | Never or almost never<br>(% yes) | 1-3 days per month<br>(% yes) | 1-5 days per week<br>(% yes) | Almost everyday<br>(% yes) |
|------------------------------------|-------|----------------------------------|-------------------------------|------------------------------|----------------------------|
| <b>Cardiovascular diseases (%)</b> |       |                                  |                               |                              |                            |
| Heart diseases                     | 856   | 74 (13.0%)                       | 94 (9.8%)                     | 355 (8.9%)                   | 333 (6.4%)                 |
| Stroke                             | 216   | 24 (4.2%)                        | 21 (2.2%)                     | 90 (2.3%)                    | 81 (1.6%)                  |
| <b>Risk factor diseases (%)</b>    |       |                                  |                               |                              |                            |
| Hyperlipidemia                     | 1,560 | 71 (12.5%)                       | 148 (15.4%)                   | 595 (14.9%)                  | 746 (14.3%)                |
| Hypertension                       | 4,637 | 262 (46.0%)                      | 418 (43.4%)                   | 1,741 (43.6%)                | 2,216 (42.6%)              |
| <b>Depression (%)</b>              |       |                                  |                               |                              |                            |
| GDS score $\geq 5$                 | 1,677 | 286 (50.2%)                      | 301 (31.3%)                   | 693 (17.4%)                  | 397 (7.6%)                 |
| GDS score $< 5$                    | 9,051 | 284 (49.8%)                      | 662 (68.7%)                   | 3,298 (82.6%)                | 4,807 (92.4%)              |
| <b>Age, years (%)</b>              |       |                                  |                               |                              |                            |
| 65-69                              | 3,143 | 125 (21.9%)                      | 247 (25.6%)                   | 1,156 (29.0%)                | 1,615 (31.0%)              |
| 70-74                              | 3,324 | 154 (27.0%)                      | 288 (29.9%)                   | 1,188 (29.8%)                | 1,694 (32.6%)              |
| 75-79                              | 2,291 | 119 (20.9%)                      | 219 (22.7%)                   | 871 (21.8%)                  | 1,082 (20.8%)              |
| $\geq 80$                          | 1,970 | 172 (30.2%)                      | 209 (21.7%)                   | 776 (19.4%)                  | 813 (15.6%)                |
| <b>Body mass index</b>             |       |                                  |                               |                              |                            |
| 1st quintile                       | 2,045 | 136                              | 209                           | 780                          | 920                        |
| 2nd quintile                       | 2,047 | 92                               | 163                           | 816                          | 976                        |
| 3rd quintile                       | 2,051 | 103                              | 168                           | 779                          | 1,001                      |
| 4th quintile                       | 2,018 | 89                               | 186                           | 698                          | 1,045                      |
| 5th quintile                       | 2,040 | 105                              | 178                           | 726                          | 1,031                      |
| Missing data                       | 527   | 45                               | 59                            | 192                          | 231                        |
| <b>Alcohol consumption (%)</b>     |       |                                  |                               |                              |                            |
| Never or almost never              | 8,681 | 485 (85.1%)                      | 767 (79.6%)                   | 3226 (80.8%)                 | 4203 (80.8%)               |
| Stopped drinking                   | 197   | 16 (2.8%)                        | 22 (2.3%)                     | 75 (1.9%)                    | 84 (1.6%)                  |
| Drinking                           | 1,718 | 66 (11.6%)                       | 152 (15.8%)                   | 638 (16.0%)                  | 862 (16.6%)                |
| Missing data                       | 132   | 3 (0.5%)                         | 22 (2.3%)                     | 52 (1.3%)                    | 55 (1.1%)                  |
| <b>Smoking habit (%)</b>           |       |                                  |                               |                              |                            |

|                                                   |       |             |             |                  |                  |
|---------------------------------------------------|-------|-------------|-------------|------------------|------------------|
| Never or almost never                             | 9,958 | 500 (87.7%) | 883 (91.7%) | 3,702<br>(92.8%) | 4,873<br>(93.6%) |
| Stopped smoking                                   | 251   | 18 (3.2%)   | 20 (2.1%)   | 108 (2.7%)       | 105 (2.0%)       |
| Currently smoking                                 | 373   | 45 (7.9%)   | 37 (3.8%)   | 133 (3.3%)       | 158 (3.0%)       |
| Missing data                                      | 146   | 7 (1.2%)    | 23 (2.4%)   | 48 (1.2%)        | 68 (1.3%)        |
| <b>Physical activity (%)</b>                      |       |             |             |                  |                  |
| Less than once per week                           | 1,119 | 153 (26.8%) | 148 (15.4%) | 397 (9.9%)       | 421 (8.1%)       |
| Once or more per week                             | 9,609 | 417 (73.2%) | 815 (84.6%) | 3,594<br>(90.1%) | 4,783<br>(91.9%) |
| Missing data                                      | 1,774 | 115 (20.2%) | 160 (16.6%) | 654 (16.4%)      | 845 (16.2%)      |
| <b>Frequency of social participation per year</b> |       |             |             |                  |                  |
| 1st quartile                                      | 2,296 | 246         | 274         | 822              | 954              |
| 2nd quartile                                      | 1,612 | 78          | 158         | 634              | 742              |
| 3rd quartile                                      | 1,907 | 60          | 170         | 687              | 990              |
| 4th quartile                                      | 1,932 | 43          | 100         | 731              | 1,058            |
| Missing data                                      | 2,981 | 143         | 261         | 1,117            | 1,460            |

---

GDS, Geriatric Depression Scale.
